# Supplementary material for: Structure inducing ionic liquids—enhancement of alpha helicity in the Abeta(1–40) peptide from Alzheimer's disease
Source: Royal Society of Chemistry journal article supplement (doi:10.1039/c1cc10377f), 2011-01-01
Supplement: c1cc10377f.pdf [file c1cc10377f.pdf]

## Electronic Supplementary Information

### Structure inducing ionic liquids- enhancement of alpha helicity in the ABeta<sub>(1-40)</sub> peptide from Alzheimer's disease.

Natalie Debeljuh, Colin Barrow, Luke Henderson and Nolene Byrne \*

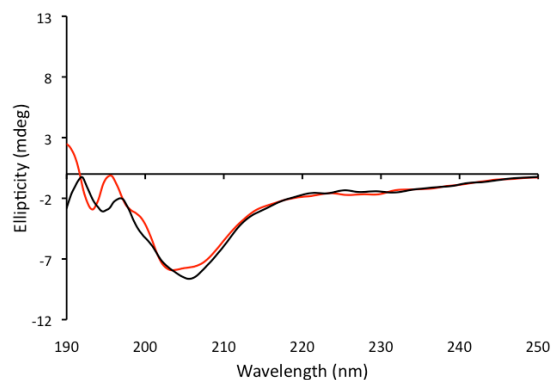

Figure S1: Far CD spectrum of ABeta<sub>1-40</sub> in aqueous pIL solution, at TeaMs concentrations of 90wt% (red), 100wt% (black).

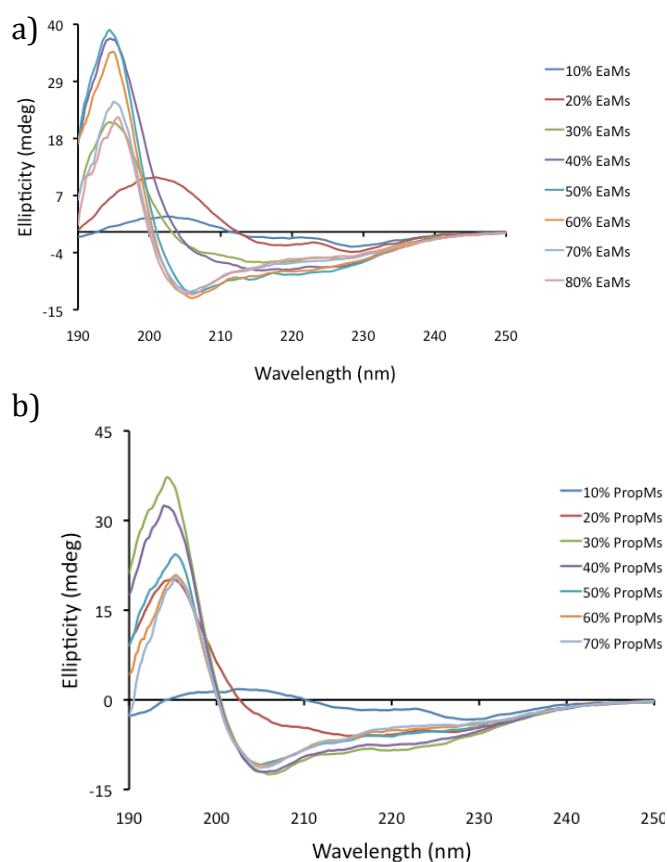

Figure S2: Far CD spectrum of modified beta peptide in a) ethylammonium mesylate b) propylammonium mesylate
